# Supplementary material for: Polymerization of 4-vinylpyridine and N,N-dimethylacrylamide using a system without organic initiator
Source: Royal Society of Chemistry journal article supplement (doi:10.1039/c1py00223f), 2011-01-01
Supplement: c1py00223f.pdf [file c1py00223f.pdf]

## Supporting Information

### Polymerization of 4-vinylpyridine and N,N-dimethylacrylamide through a system without organic initiator

Sijing Xia, Bin Yang, Guangzhao Li, Xiaoqing Zhu, Anning Wang and Jin Zhu\*

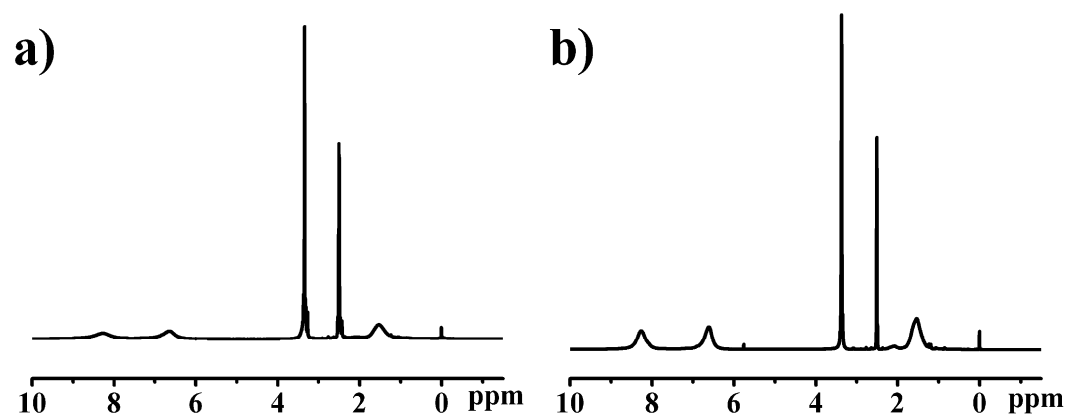

**Fig S1.**  $^1\text{H}$  NMR (500 MHz,  $\text{DMSO-d}_6$ ) of P4VP prepared from a) polymerization without organic initiator; b) ATRP: 8.25 (2H), 6.63 (2H), 3.37 (s,  $\text{H}_2\text{O}$ ), 2.50 (s,  $\text{DMSO-d}_6$ ), 1.52 (3H).

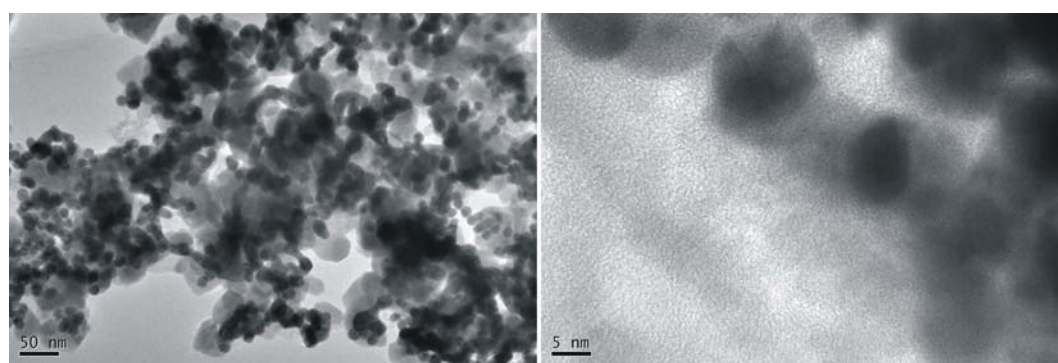

**Fig S2.** TEM of CuCl/Me<sub>6</sub>TREN with AuNPs in Water/2-propanol (1:1, volume ratio) solution. Cu(I) could be observed around AuNPs.
